# Supplementary material for: HSP90 Interacts with the Fibronectin N-terminal Domains and Increases Matrix Formation
Source: PubMed Central journal article supplement (PMC7072298; doi:10.3390/cells9020272), 2020-01-22

Article

# Analysis of the interaction between Hsp90 and the extracellular matrix protein, fibronectin

Abir Chakraborty <sup>1</sup>, Natasha Marie-Eraïne Boel <sup>1</sup> and Adrienne Lesley Edkins <sup>1,2,\*</sup>

<sup>1</sup> Biomedical Biotechnology Research Unit, Department of Biochemistry and Microbiology, Rhodes University, Grahamstown

<sup>2</sup> Centre for Chemico- and Biomedical Research, Rhodes University, Grahamstown, 6140, South Africa

\* Correspondence: [a.edkins@ru.ac.za](mailto:a.edkins@ru.ac.za)

**Table S1: Primer sequences used to generate expression plasmids used in this study**

| Amplicon             | Sequence of the primer (Forward=F and Reverse=R)   |
|----------------------|----------------------------------------------------|
| VC-FN30              | F AAGGGCCCGCCACCATGGGCATCCTTCCCAG                  |
|                      | R AAAGGGCCCAACATCGGTGAAGGGGCCAGATCCG               |
| VC-FN70              | F AAGGGCCCGCCACCATGGGCATCCTTCCCAG                  |
|                      | R AAGGGCCCGCCACCATGGGCATCCTTCCCAG                  |
| VN-HSP90 $\alpha$ -M | F AAAAGATCTAGACAAGAAGAAGAAGAAGATTAAGGAAAAGTACATCG  |
|                      | R GTCGACTTGAGCTTTCATGATTCTCTCCATGTTTGC             |
| VN-HSP90 $\alpha$    | F AAAGTCGACCACCACCACCACCACCACATGCCGG               |
|                      | R AAAGTCGACATCAACCTCTTCCATACGGCTGGTATCGTCATCACCTTC |
| VC-CDK4              | F GAATTCAAATGGCTACCTCTCGATATGAGC                   |
|                      | R GTCGACAACCTCCGATTACCTTCATCCTTATGTAG              |
| FN30-EGFP            | F GGATCCGCCACCATGCTTAGGGGTCCGGGGC                  |
|                      | R GAATTCAACATCGGTGAAGGGGCCAGATCC                   |
| FN70-EGFP            | F GGATCCGCCACCATGCTTAGGGGTCCGGGGC                  |
|                      | R AAGAATTCGGTCTGTAAAGGTTGGCAATGCC                  |

**Table S2: PCR parameters used in this study**

| Name of the coding region                   | PCR parameter                                                             |
|---------------------------------------------|---------------------------------------------------------------------------|
| VC-FN30, FN30 ,VN-HSP90 $\alpha$ M and CDK4 | 98°C/30s; (98°C/30s, 58°C/25s, 72°C/50s) x 30 cycles; 72°C/10 mins.       |
| VC-FN70, FN70                               | 98°C/30s; (98°C/30s , 58°C/25s, 72°C/60s) x 30 cycles; 72°C/ 10 mins.     |
| HSP90 $\alpha$                              | 98°C/30s: (98°C/30s, 58°C/25s, 72°C/2.5 mins) x 30 cycles; 72°C/ 10 mins. |

**Table S3: Key resources used in this study**

| Key resources                             | Source                         |
|-------------------------------------------|--------------------------------|
| pGEX-4T-1-GST-HSP90M                      | [1]                            |
| pGEX-4T-1-GST-HSP90N                      | [1]                            |
| pGEX-4T-1-GST-HSP90C                      | [1]                            |
| pGEX-4T-3-GST                             | [2]                            |
| pcDNA-Flag-HSP90 $\alpha$ D93A            | [3]                            |
| pcDNA-Flag-HSP90 $\alpha$ WT              | [4]                            |
| pcDNA-Flag-HSP90 $\alpha$ -Y313E          | [4]                            |
| pcDNA-Flag-HSP90 $\alpha$ -Y313F          | [4]                            |
| pHLSec2-FN-YPET                           | [5]                            |
| pcDNA-HA-HSP90 $\alpha$ E47A              | [6]                            |
| pcDNA-HA-HSP90 $\alpha$ WT                | [4]                            |
| pBiFC-VC155                               | [7]                            |
| pBiFC-VN173                               | [7]                            |
| pBiFC-VC155-CDK4                          | This study                     |
| pBiFC-VC155-del-bFos                      | [7]                            |
| pBiFC-VC155-FN30                          | This study                     |
| pBiFC-VC155-FN70                          | This study                     |
| pBiFC-VN173-HSP90 $\alpha$                | This study                     |
| pBiFC-VN173-HSP90 $\alpha$ -M             | This study                     |
| pBiFC-VN173-bJun                          | [7]                            |
| pcDNA3-eGFP-FN30                          | This study                     |
| pcDNA3-eGFP-FN70                          | This study                     |
| pcDNA3-FN-3X-Type-I-HA-His                | This study                     |
| pcDNA3-FN-2X-Type-II-HA-His               | This study                     |
| mCherry-HSP90 $\beta$                     | [8]                            |
| Anti GFP antibody                         | SC8334 (1:2000 dilution)       |
| Anti HA antibody                          | Ab9110 (1:10000 dilution)      |
| Anti Flag antibody                        | Ab49763 (1:10000 dilution)     |
| Anti HSP90 $\alpha$ antibody              | ADI-SPA-840 (1:10000 dilution) |
| Anti His antibody                         | SC51946 (1:1000 dilution)      |
| HRP-anti mouse secondary antibody         | A16011 (1:5000 dilution)       |
| HRP-anti rabbit secondary antibody        | A16023 (1:10000 dilution)      |
| HRP-anti rat secondary antibody           | A18739 (1:5000) dilution       |
| Anti GFP antibody (magnetic beads)        | Ab193983                       |
| <i>Bam</i> HI, <i>Eco</i> RI,             | NEB-R3136S, R3101S             |
| T4 DNA Ligase                             | NEB-M0202S                     |
| <i>Apa</i> I, <i>Sal</i> I, <i>Bgl</i> II | NEB-R0114S,R-3138S,R-0144S     |
| Protino glutathione agarose 4B            | 745500.10                      |
| Ni-NTA agarose beads                      | Qiagen 30210                   |
| pGEM-T and pGEM-T easy                    | Promega-A3600, A1360           |

**Purification of recombinant proteins**

For purification, GST-HSP90 $\alpha$ M, GST-HSP90 $\alpha$ N, GST-HSP90 $\alpha$ C and GST were purified from induced *E.coli* XL1 Blue lysates according to the batch purification protocol in the Protino® Glutathione agarose 4B user manual. Protein expression was induced at OD600 0.6 with 1 mM IPTG for 4 hours. Cells were harvested at 6000  $\times$ g for 15 minutes at 4 °C. Cell pellets were resuspended in wash/equilibration buffer (50 mM Tris, pH 8.0, 150 mM NaCl) with Lysozyme (1 mg/ml), and PMSF (1 mM), and kept on ice for 20 minutes before incubating at -80°C overnight. Cell lysates were sonicated and centrifuged at 10000 $\times$ g for 30 minutes at 4 °C. Supernatants were loaded into the

equilibrated Protino GSH Agarose beads and allowed to bind with the beads for 30-45 minutes at room temperature on rotating mixer. The beads were washed with wash buffer and proteins were eluted with GSH wash buffer containing 10 mM reduced glutathione. Purification was verified by SDS-PAGE.

His tagged HSP90 $\alpha$  was expressed and purified from *E.coli* BL21(DE3) using codon optimized HSP90 $\alpha$  sequence in the plasmid pET16b synthesized by Genscript (Hong Kong). At an OD600 of 0.6, the culture was treated with 0.5 mM IPTG to initiate protein expression for 20 hours at 25 °C. Bacterial cells were harvested at 6000xg for 15 minutes at 4°C and the cell pellet was resuspended in His wash/lysis buffer (10 mM Tris pH 7.5, 300 mM NaCl and 50 mM imidazole) with lysozyme (1 mg/ml), and PMSF (1 mM). The cell lysate was fractionated at 16000xg for 30 mins at 4° C, and the supernatant loaded onto Ni<sup>2+</sup>-charged sepharose beads followed by incubation overnight at 4°C on a rocker. Washing was performed with cold wash buffer containing 50-100 mM imidazole, and proteins eluted with cold elution buffer (10 mM Tris-HCl pH7.5, 300mM NaCl, 300 mM imidazole). All purified proteins (GST-tagged and His-tagged) were passed through a clean and concentration column with the appropriate MWCO filter prior to further analysis. Desalting was performed using Zeba spin columns as required.

## References

1. Fontana, J.; Fulton, D.; Chen, Y.; Fairchild, T.A.; McCabe, T.J.; Fujita, N.; Tsuruo, T.; Sessa, W.C. Domain mapping studies reveal that the M domain of hsp90 serves as a molecular scaffold to regulate Akt-dependent phosphorylation of endothelial nitric oxide synthase and NO release. *Circulation Research* **2002**, *90*, 866–873.
2. Hunter, M.C.; O'Hagan, K.L.; Kenyon, A.; Dhanani, K.C.H.; Prinsloo, E.; Edkins, A.L. Hsp90 binds directly to fibronectin (FN) and inhibition reduces the extracellular fibronectin matrix in breast cancer cells. *PLoS ONE* **2014**, *9*.
3. Woodford, M.R.; Sager, R.A.; Marris, E.; Dunn, D.M.; Blanden, A.R.; Murphy, R.L.; Rensing, N.; Shapiro, O.; Panaretou, B.; Prodromou, C.; et al. Tumor suppressor Tsc1 is a new Hsp90 co-chaperone that facilitates folding of kinase and non-kinase clients. *The EMBO Journal* **2017**, *36*, 3650–3665.
4. Xu, W.; Beebe, K.; Chavez, J.D.; Boysen, M.; Lu, Y.Y.; Zuehlke, A.D.; Keramisanou, D.; Trepel, J.B.; Prodromou, C.; Mayer, M.P.; et al. Hsp90 middle domain phosphorylation initiates a complex conformational program to recruit the ATPase-stimulating cochaperone Aha1. *Nature Communications* **2019**, *10*.
5. Ohashi, T.; Erickson, H.P. Fibronectin aggregation and assembly: The unfolding of the second fibronectin type III domain. *Journal of Biological Chemistry* **2011**, *286*, 39188–39199.
6. Prince, T.L.; Kijima, T.; Tatokoro, M.; Lee, S.; Tsutsumi, S.; Yim, K.; Rivas, C.; Alarcon, S.; Schwartz, H.; Khamit-Kush, K.; et al. Client proteins and small molecule inhibitors display distinct binding preferences for constitutive and stress-induced hsp90 isoforms and their conformationally restricted mutants. *PLoS ONE* **2015**, *10*.
7. Shyu, Y.J.; Liu, H.; Deng, X.; Hu, C.D. Identification of new fluorescent protein fragments for bimolecular fluorescence complementation analysis under physiological conditions. *BioTechniques* **2006**, *40*, 61–66.
8. Picard, D.; Suslova, E.; Briand, P.A. 2-color photobleaching experiments reveal distinct intracellular dynamics of two components of the Hsp90 complex. *Experimental Cell Research* **2006**, *312*, 3949–3958.

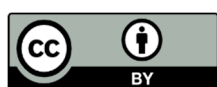

Supplement: cells-09-00272-s001.pdf [file cells-09-00272-s001.pdf]
